# Supplementary material
Source: MDPI journal article supplement (https://www.mdpi.com/2073-445X/11/5/630)
Supplement: s1 [file s1]

## Supplement

**Table S1.** Weights of the threat data.

| Threat factor     | Maximum influence distance/km | Weight | Decay type        |
|-------------------|-------------------------------|--------|-------------------|
| Cultivated land   | 1                             | 0.15   | Linear decay      |
| Construction land | 5                             | 1      | Exponential decay |
| Bare land         | 1                             | 0.3    | Linear decay      |

**Table S2.** Sensitivities of the habitat types to each threat.

| Land use type     | Habitat suitability | Cultivated land | Construction land | Bare land |
|-------------------|---------------------|-----------------|-------------------|-----------|
| Cultivated land   | 0.5                 | 0.1             | 0.6               | 0.4       |
| Forest land       | 1                   | 0.2             | 0.8               | 0.4       |
| Grassland         | 1                   | 0.3             | 0.5               | 0.2       |
| Bare land         | 0.3                 | 0.1             | 0.2               | 0         |
| Construction land | 0                   | 0               | 0                 | 0         |
| Water area        | 1                   | 0.4             | 0.8               | 0.2       |

**Table S3.** Characteristic roots and variance contribution rate derived from the principal component analysis.

| Composition | Characteristics of the root | Variance contribution rate | Cumulative % |
|-------------|-----------------------------|----------------------------|--------------|
| 1           | 3.831                       | 22.533                     | 22.533       |
| 2           | 2.479                       | 14.58                      | 37.113       |
| 3           | 1.884                       | 11.081                     | 48.194       |
| 4           | 1.581                       | 9.302                      | 57.496       |
| 5           | 1.335                       | 7.85                       | 65.346       |
| 6           | 1.161                       | 6.828                      | 72.174       |
| 7           | 1.076                       | 6.332                      | 78.506       |
| 8           | 1.004                       | 5.908                      | 84.414       |

**Table S4.** Factors of each component.

| Composition                                     | 1     | 2     | 3      | 4     | 5      | 6     | 7      | 8     |
|-------------------------------------------------|-------|-------|--------|-------|--------|-------|--------|-------|
| Conversion of forest land to cultivated land    | 0.889 | 0.172 | -0.103 | 0.198 | -0.044 | 0.176 | -0.187 | 0.171 |
| Conversion of the water area to cultivated land | 0.866 | 0.245 | -0.003 | 0.17  | 0.187  | 0.072 | 0.121  | 0.088 |

| Composition                                              | 1      | 2      | 3      | 4      | 5      | 6      | 7      | 8      |
|----------------------------------------------------------|--------|--------|--------|--------|--------|--------|--------|--------|
| Conversion of the water area to forest land              | 0.715  | -0.125 | -0.126 | -0.189 | 0.508  | -0.132 | -0.015 | -0.009 |
| Conversion of forest land to grassland                   | 0.616  | 0.117  | -0.211 | 0.101  | -0.194 | 0.116  | -0.485 | 0.338  |
| Conversion of cultivated land to construction land       | -0.606 | 0.443  | 0.24   | 0.02   | 0.492  | 0.063  | -0.304 | 0.077  |
| Conversion of grassland to construction land             | -0.581 | 0.479  | 0.244  | 0.132  | 0.331  | 0.228  | 0.039  | 0.311  |
| Conversion of the water area to grassland                | 0.469  | 0.325  | 0.398  | -0.461 | 0.044  | -0.34  | -0.006 | -0.181 |
| Conversion of bare land to construction land             | 0.132  | 0.644  | 0.343  | 0.154  | 0.084  | 0.143  | 0.318  | 0.154  |
| Conversion of the water area to bare land                | 0.498  | 0.639  | 0.233  | -0.092 | -0.212 | -0.085 | 0.141  | -0.213 |
| Conversion of grassland to forest land                   | 0.211  | -0.591 | 0.734  | -0.025 | -0.043 | 0.147  | 0.027  | 0.007  |
| Conversion of cultivated land to forest land             | 0.072  | -0.213 | 0.704  | 0.156  | -0.058 | -0.468 | 0.038  | 0.185  |
| Conversion of forest land to construction land           | 0.004  | 0.239  | -0.04  | 0.742  | -0.299 | 0.09   | 0.337  | -0.248 |
| Conversion of the water area to construction land        | -0.238 | 0.49   | -0.097 | -0.509 | -0.322 | 0.103  | -0.099 | -0.306 |
| Conversion of grassland to cultivated land               | -0.166 | -0.113 | -0.001 | 0.473  | -0.118 | -0.433 | -0.272 | -0.066 |
| Conversion of cultivated land to water area              | 0.161  | -0.233 | -0.394 | 0.057  | 0.532  | -0.129 | 0.398  | -0.199 |
| Conversion of bare land to grassland and cultivated land | 0.195  | -0.481 | 0.356  | -0.08  | -0.003 | 0.653  | 0.017  | -0.197 |
| Conversion of cultivated land to grassland               | -0.097 | -0.122 | -0.197 | -0.371 | -0.317 | -0.066 | 0.467  | 0.614  |
